# Supplementary material for: Near-Infrared Fluorescence Probe for Visualizing Fluctuations of Peroxynitrite in Living Cells and Inflammatory Mouse Models
Source: MDPI journal article supplement (doi:10.3390/chemosensors11060316), 2023-05-24
Supplement: s1 [file s1]

Archive with 1 entries (1 files):
- chemosensors-2385257-supplementary.pdf
