# Supplementary material for: Near-Infrared Fluorescence Probe for Visualizing Fluctuations of Peroxynitrite in Living Cells and Inflammatory Mouse Models
Source: MDPI journal article supplement (doi:10.3390/chemosensors11060316), 2023-05-24
Supplement: s1 [file s1 › chemosensors-2385257-supplementary.pdf]

## Table of contents

|                       |    |
|-----------------------|----|
| 1. Synthesis          | S2 |
| 2. Supplementary Data | S2 |
| 3. NMR data           | S5 |

## 1. Synthesis

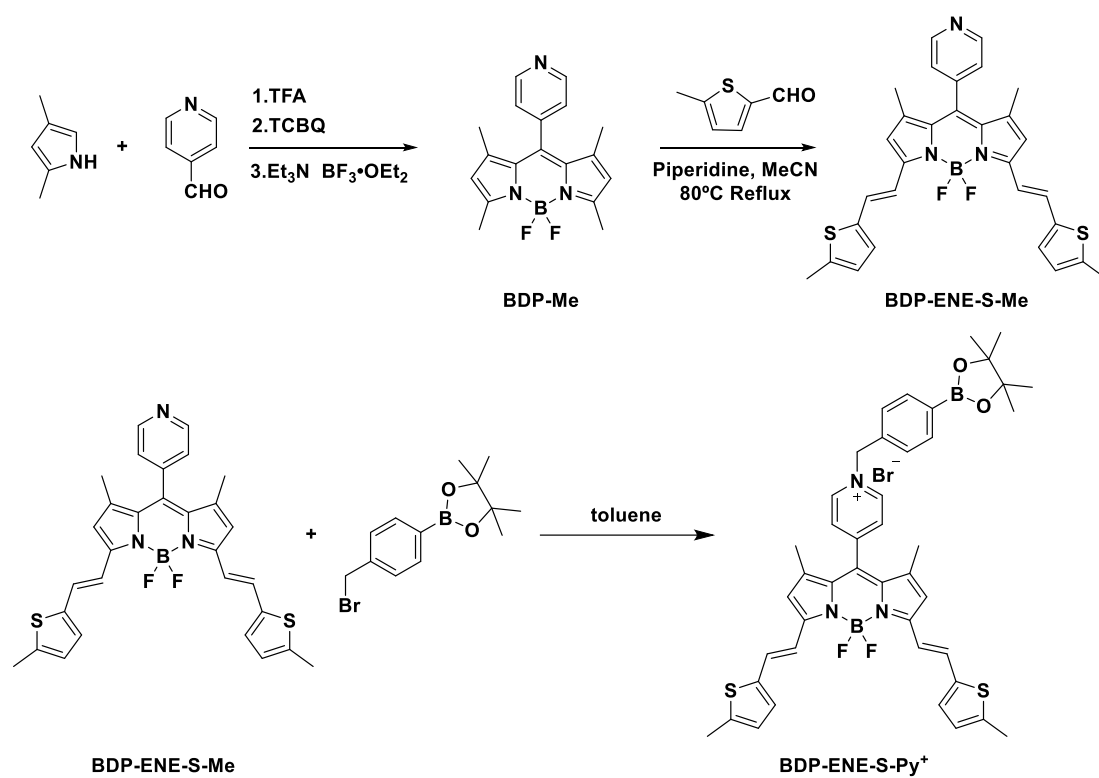

Scheme S1. The synthesis routine of **BDP-ENE-S-Py<sup>+</sup>**.

## 2. Supplementary Date

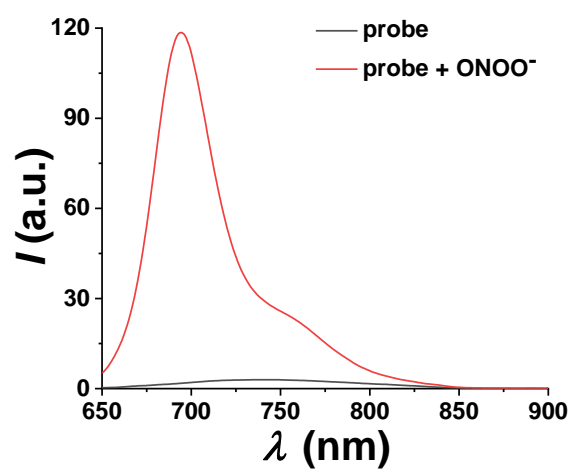

**Figure S1.** Fluorescence emission spectra of probe **BDP-ENE-S-Py<sup>+</sup>** (10  $\mu$ M) before and after reaction with **ONOO<sup>-</sup>** (100  $\mu$ M).

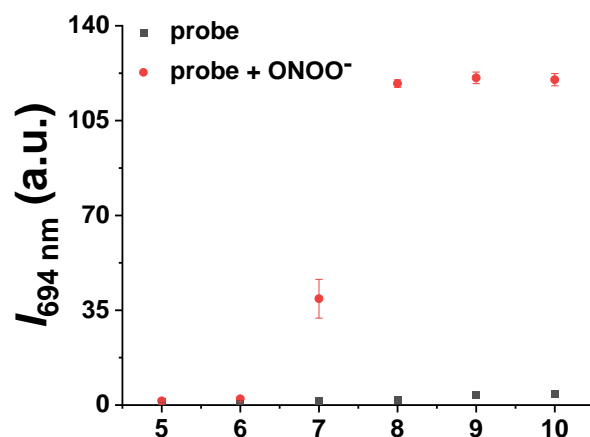

**Figure S2.** Fluorescence intensity spectra of the probe **BDP-ENE-S-Py<sup>+</sup>** (10  $\mu$ M) reacted with **ONOO<sup>-</sup>** (100  $\mu$ M) at different pH values for 2 min. The reaction was carried out in acetonitrile/PBS (1:1, v/v, 10 mM, pH 7.4) at room temperature.  $\lambda_{\text{ex}}$  = 630 nm and  $\lambda_{\text{em}}$  = 694 nm.

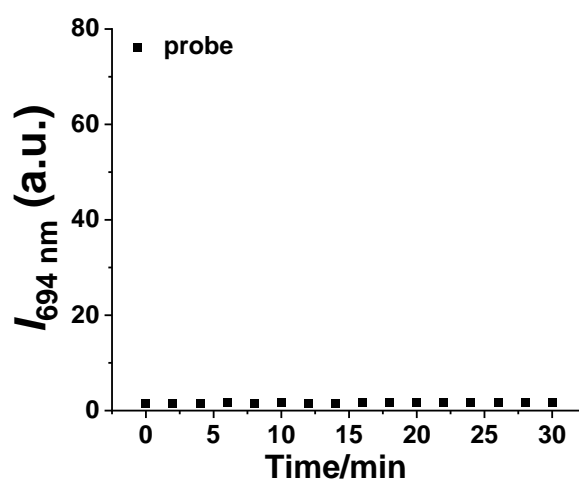

**Figure S3.** Probe time stability test. The probe **BDP-ENE-S-Py<sup>+</sup>** (10  $\mu$ M) was measured in the buffer system every two minutes for 30 minutes. The buffer system was acetonitrile/PBS (1:1, v/v, 10 mM, pH 7.4).  $\lambda_{\text{ex}}$  = 630 nm and  $\lambda_{\text{em}}$  = 694 nm.

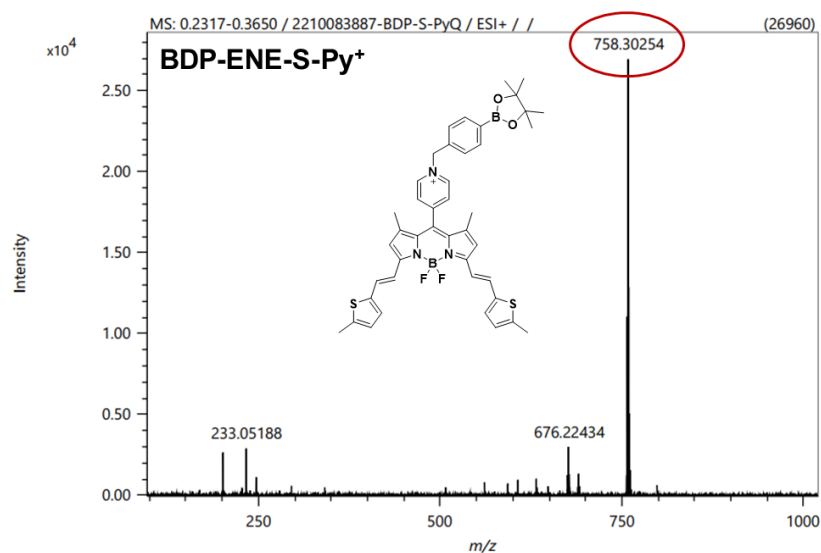

**Figure S4.** The ESI-MS of BDP-ENE-S-Py<sup>+</sup>.

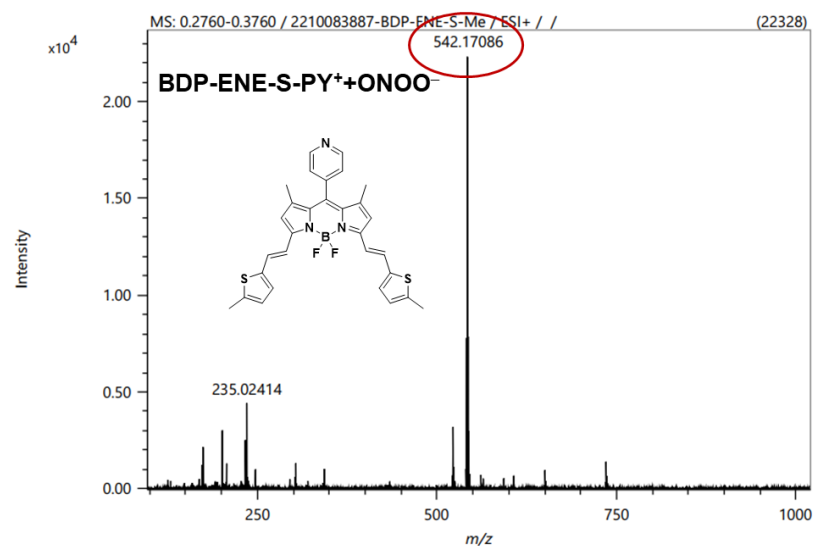

**Figure S5.** The ESI-MS of BDP-ENE-S-Py<sup>+</sup> upon addition of ONOO<sup>-</sup>.

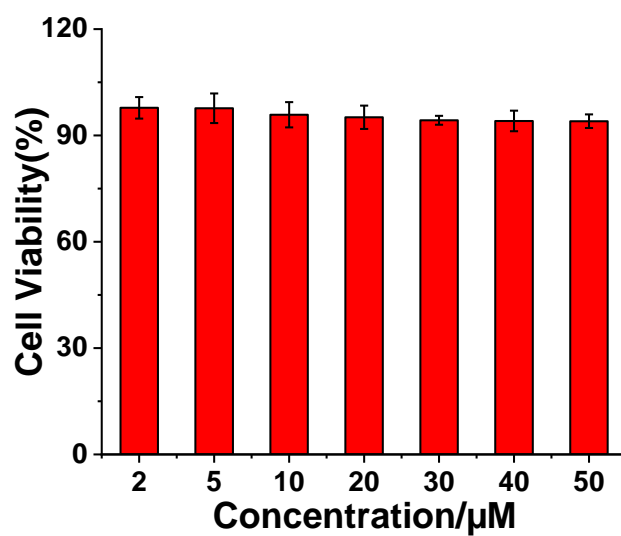

**Figure S6.** Cytotoxicity assays of BDP-ENE-S-Py<sup>+</sup> in living HepG2 cells.

### 3. NMR data

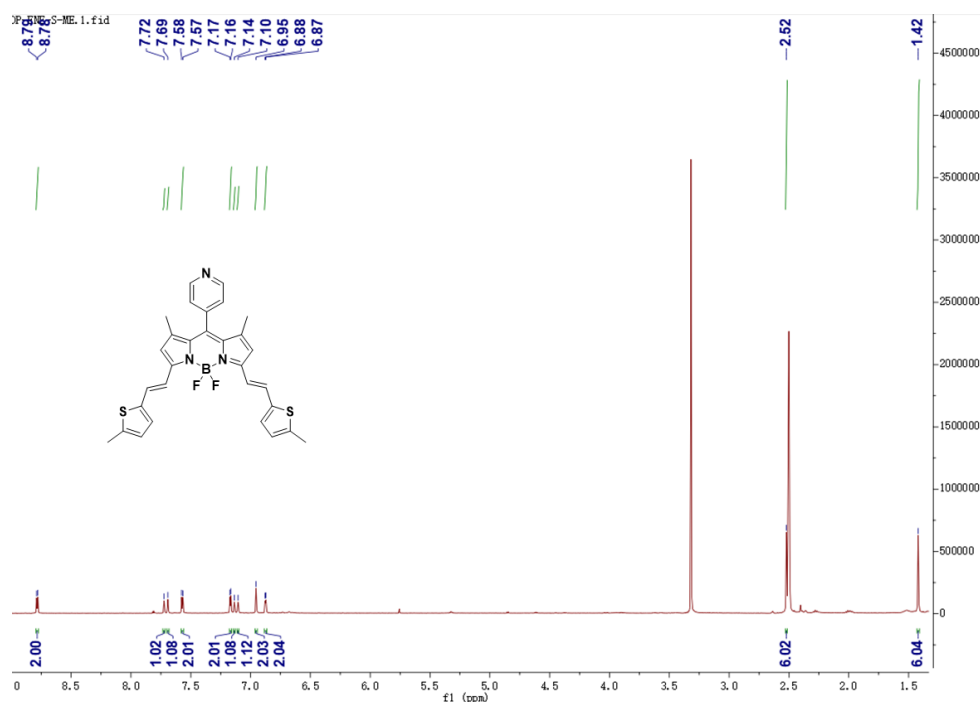

Figure S7. <sup>1</sup>H NMR of BDP-ENE-S-Me.

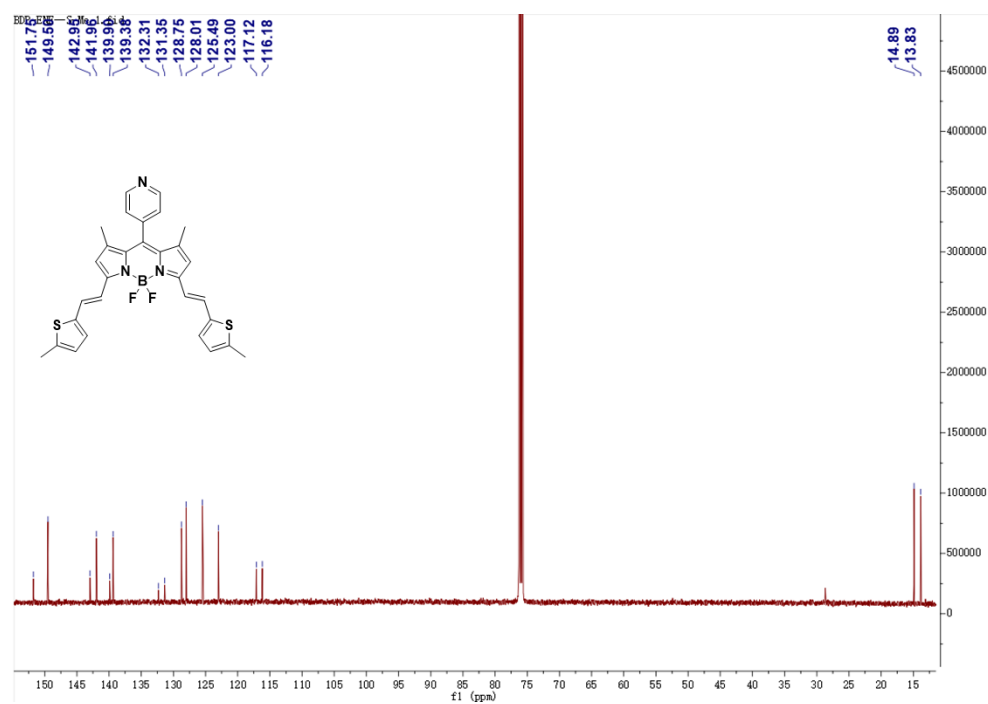

Figure S8. <sup>13</sup>C NMR of BDP-ENE-S-Me.

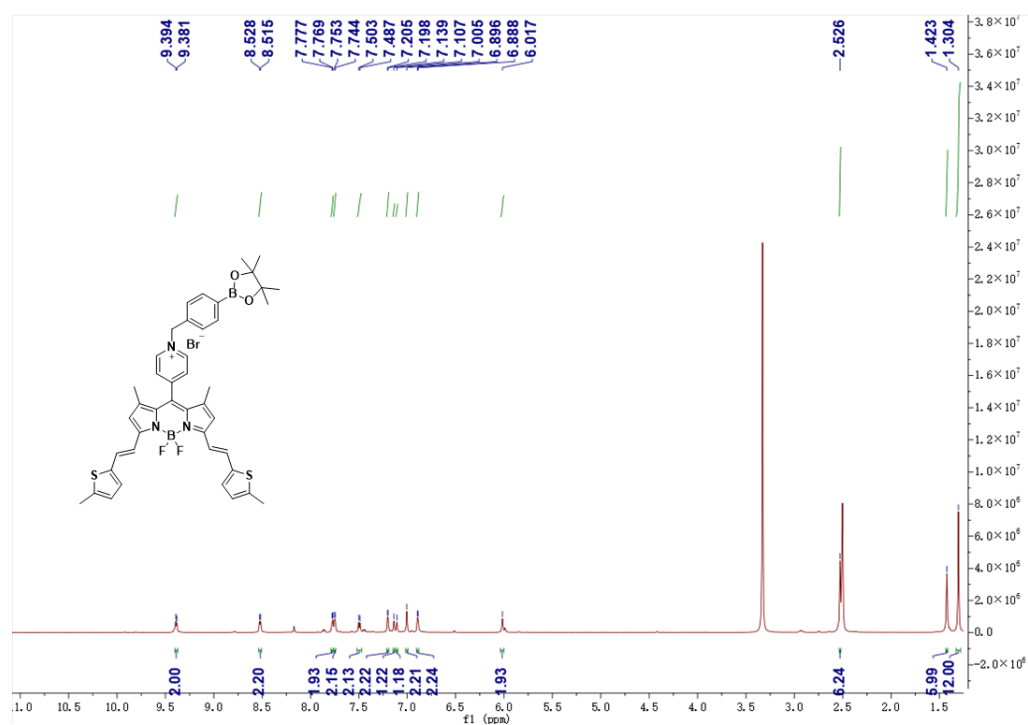

Figure S9.  $^1\text{H}$  NMR of BDP-ENE-S-Py $^+$ .

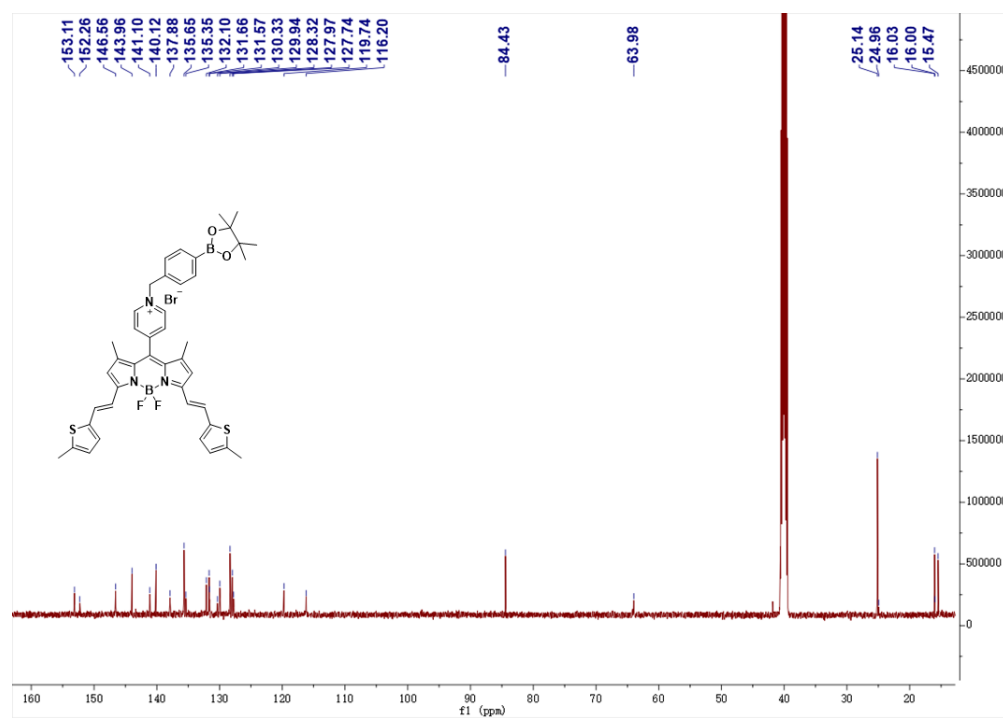

Figure S10.  $^{13}\text{C}$  NMR of BDP-ENE-S-Py $^+$ .
